# Supplementary material
Source: Springer Nature journal article supplement (https://www.springermedizin.de/resource/supplementary/12958_2012_999_MOESM2_ESM.pdf/9566604)

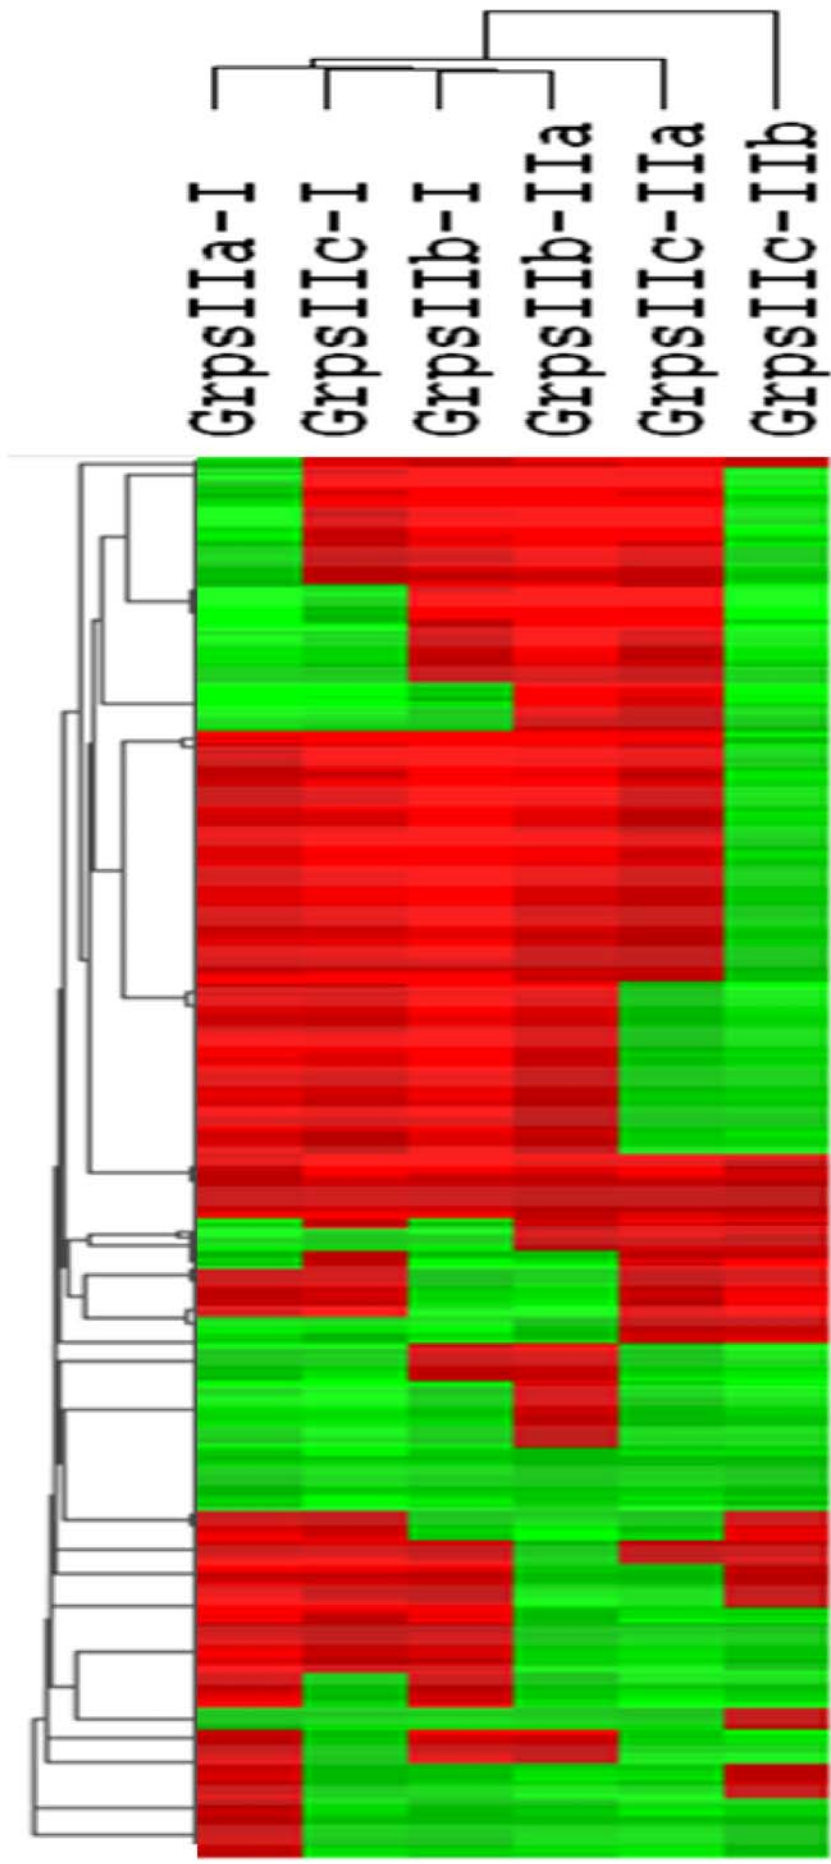

Hierarchical clustering map of miRNA genes among comparison groups.

Supplement: MOESM2 [file 9566604]
